# Supplementary material
Source: HighWire-hosted journal article supplement (doi:10.1101/rna.079243.122)
Supplement: Supplemental_Figures_and_Table.docx [file Supplemental_Figures_and_Table.docx]

*Supplementary material for:*

**Replication of alphaviruses requires a pseudoknot that involves the polyA tail**.

René CL Olsthoorn

*Leiden Institute of Chemistry, Leiden University, P.O. Box 9502, 2300 RA Leiden, The Netherlands*

Correspondence: olsthoor@chem.leidenuniv.nl


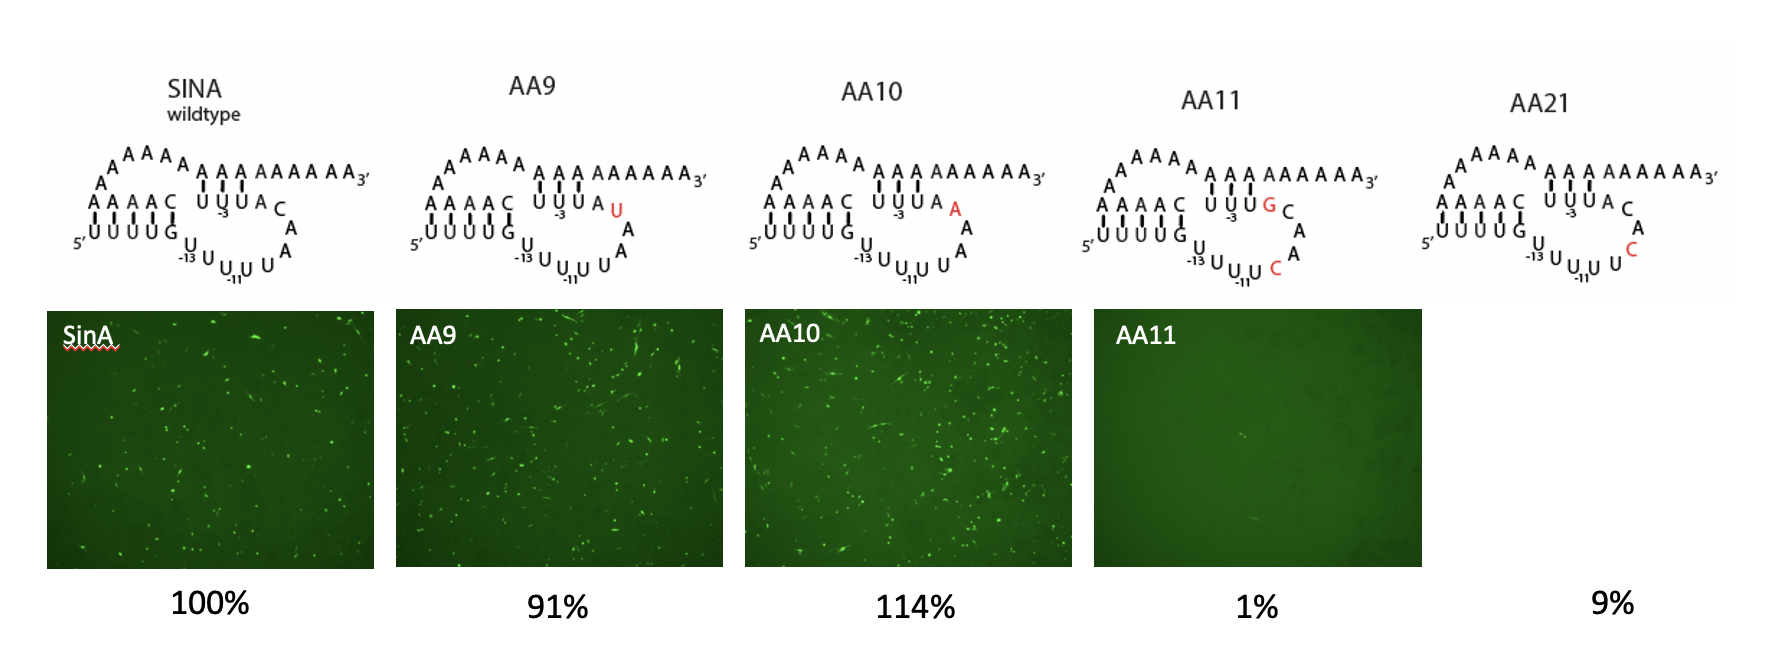


**Fig. S1. Replication of mutants in the conserved UAANA motif.** The UAANA motif that is in between the U-stretches is a strongly conserved feature that has been investigated by others before (Kuhn et al. 1990; Hardy & Rice, 2005). To check whether the SINV replicon system is equally sensitive towards changes in this motif several mutants were tested. The activities of UAAUA, UAAAA and UCACA were 91%, 114%, and 9% respectively, matching quite well with 135%, 72%, and 0.8% as reported for minus strand synthesis by Hardy & Rice (2005), although in the replicon system UAAAA performed better than UAAUA. To test whether A-8 may be involved in a base pair with U-4 these bases were replaced by G and C respectively. The resulting mutant AA11 was nearly dead (1%) suggesting the identity of these bases is crucial for replication and/or that the forced base-pairing severely affects the structure of the pseudoknot.

­

Fig. S2. “Raju’s revertants”. Sequences of stable deletion mutants and revertants obtained in studies by Raju and coworkers (Raju et al. 1999; George & Raju, 2000) were manually drawn as pseudoknot structures involving the polyA tail. S3-4, S3-23, ZA1-5 contain additional nucleotide insertions (not shown here) upstream of the predicted pseudoknot.


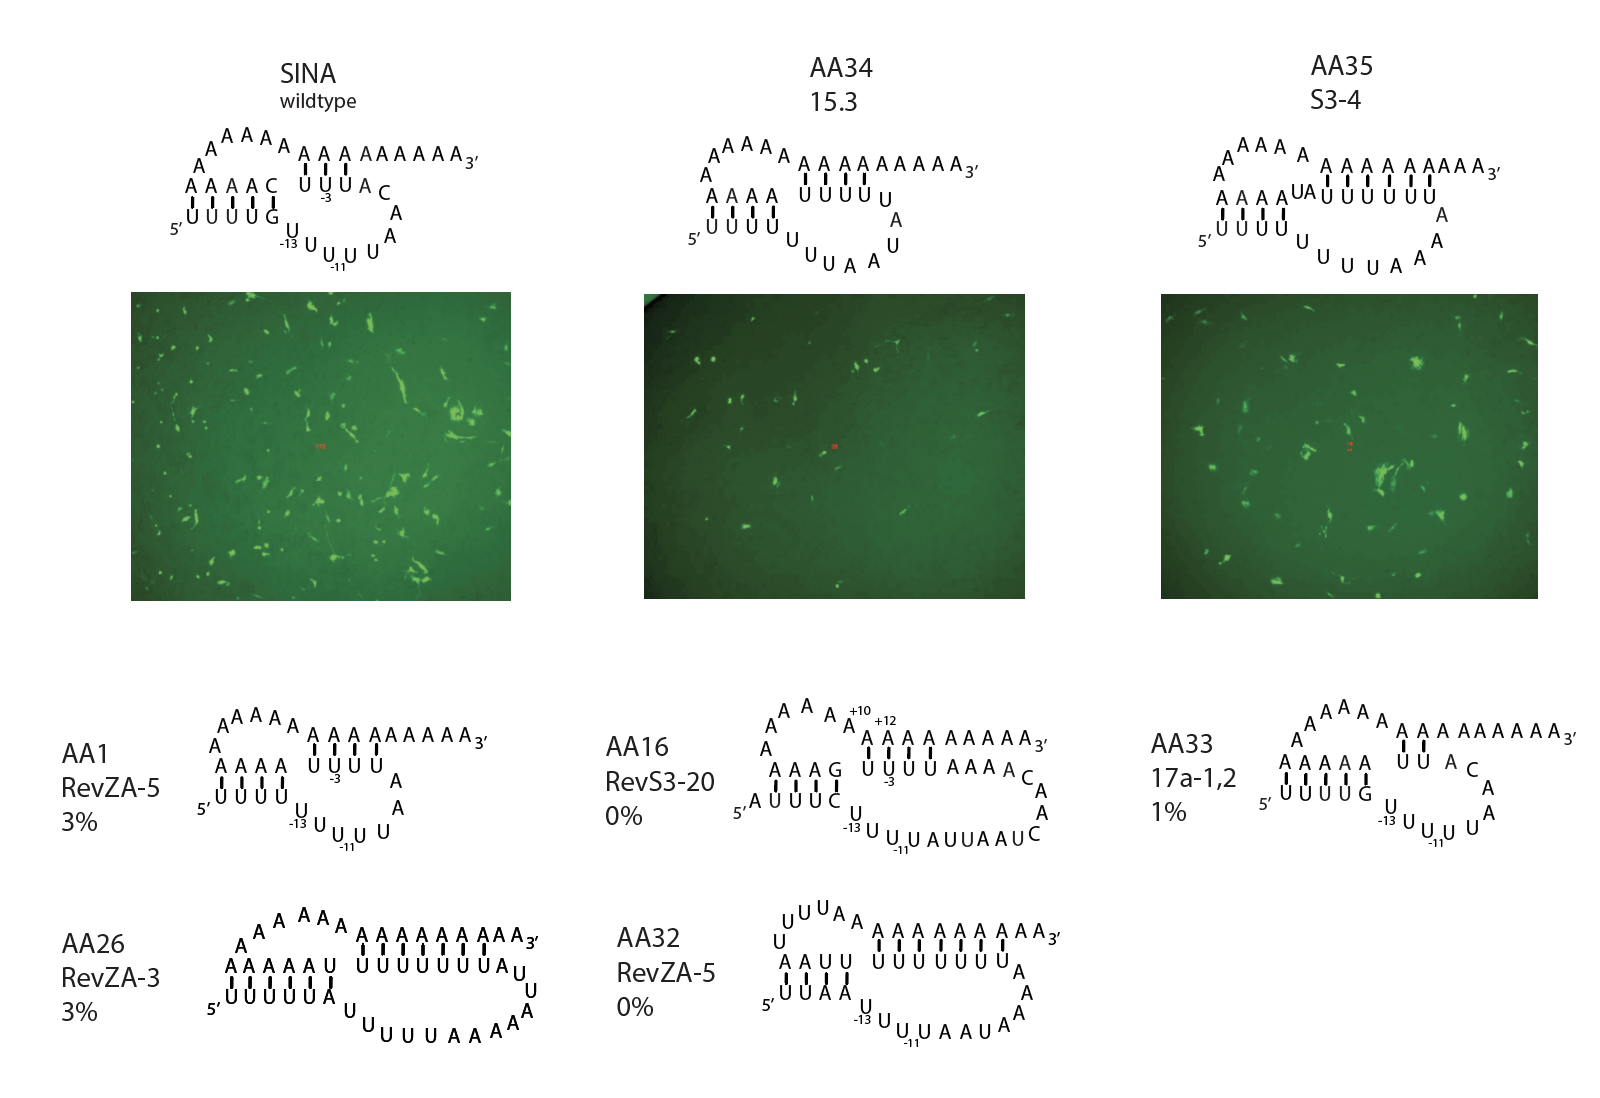


Fig. S3. Replication of a selection of pseudoknot variants as found in the indicated Raju revertants and mutants. AA1 and AA32 are two possible pseudoknot structures predicted for the ZA-5 revertant (Fig. S2).

| Supplementary Table S1: PCR PRIMERS | |
| --- | --- |
| SP6SIN | ATCGTATACGATTTAGGTGACACTATAGATTGACGGCGTAGTACACAC |
| SP6FLU | CCATTAAGCTTATTTAGGTGACACTATAGAAGAGATCACTAGAAGCTAGCAAAAGCAGGG |
| SINA29 | TTTTTTTTTTTTTTTTTTTTTTTTTTTTTGAAATGTTAAAAACAAAATTTTGTTG |
| SINA20 | TTTTTTTTTTTTTTTTTTTTGAAATGTTAAAAACAAAATTTTGTTG |
| SINA14 | TTTTTTTTTTTTTTGAAATGTTAAAAACAAAATTTTGTTG |
| SINA11 | TTTTTTTTTTTGAAATGTTAAAAACAAAATTTTGTTG |
| SINA8 | TTTTTTTTGAAATGTTAAAAACAAAATTTTGTTG |
| SINA4 | TTTTGAAATGTTAAAAACAAAATTTTGTTG |
| SINA0 | GAAATGTTAAAAACAAAATTTTGTTG |
| SINB1 | TTTTTTTTTTTTTTTTTTTTTTTTTTTTTGAAATGTTAAAAATAAAATTTTGTTG |
| SINB2 | TTTTTTTTTTTTTTTTTTTTTTTTTTTTTAAAATGTTAAAAATAAAATTTTGTTG |
| SINC1 | TTTTTTTTTTTTTTTTTTTTTTTTTTTTTGAAATGTTAAAAACCAAATTTTGTTG |
| SINC2 | TTTTTTTTTTTTTTTTTTTTTTTTTTTTGGAAATGTTAAAAACCAAATTTTGTTG |
| SIND1 | TTTTTTTTTTTTTTTTTTTTTTTTTTTTTGAAATGTTAAAAACTATATTTTGTTG |
| SIND2 | TTTTTTTTTTTTTTTTTTTTTTTTTTATAGAAATGTTAAAAACTATATTTTGTTG |
| SINE1 | TTTTTTTTTTTTTTTTTTTTTTTTTGTGGAAATGTTAAAAACGAGTTTTGTTGATTAATAAAAG |
| SINE2 | TTTTTTTTTTTTTTTTTTTTTTTTTGTGGAAATGTTAAAAACCACTTTTGTTGATTAATAAAAG |
| SINF | TTTTTTTTTTTTTTTTTTTTTTTTTCCTTGAAATGTTAAAAACAAGGTTTTGTTG |
| SING | TTTTTTTTTTTTTTTTTTTTTTTTTCCCGGAAATGTTAAAAACCGGGTTTTGTTGATTAATAAAAG |
| SINH | TTTTTTTTTTTTTTTTTTTTTTTTTTTTTGAAAATGTTAAAAACAAAATTTTGTTG |
| SINI | TTTTTTTTTTTTTTTTTTTTTTTTTGTGGAAATGTTAAAAACGAGTTTTGTTG |
| SINJ | TTTTTTTTTTTTTTTTTTTTTTTTTTTTTGGAATGTTAAAAACAAAATTTTGTTG |
| SINK1 | TTTTTTTTTTTTTTTTTTTTTTTTTTTTTGAGATGTTAAAAACAAAATTTTGTTG |
| SINK2 | TTTTTTTTTTTTTTTTTCTTTTTTTTTTTGAGATGTTAAAAACAAAATTTTGTTG |
| SINL1 | TTTTTTTTTTTTTTTTTTTTTTTTTTTTTGAAATGTTAAAAGCAAAATTTTGTTG |
| SINL2 | TTTTTTTTTTTTTTTTTTTTTTTTTTTTTGAAATGTTAAAACCAAAATTTTGTTG |
| SINL3 | TTTTTTTTTTTTTTTTTTTTTTTTTTTTTGAAATGTTAAAGACAAAATTTTGTTG |
| SINL4 | TTTTTTTTTTTTTTTTTTTTTTTTTTTTTGAAATGTTAAGAACAAAATTTTGTTG |
| SINL5 | TTTTTTTTTTTTTTTTTTTTTTTTTTTTTGAAATGTTAAGGACAAAATTTTGTTG |
| SINL6 | TTTTTTTTTTTTTTTTTTTTTTTTTTTTTGAAATGTTTTAAACAAAATTTTGTTG |
| SINM | TTTTTTTTTTTTTTTTTTTTTTTTTTTTTGAGATGTTAAAGACAAAATTTTGTTG |
| SINN | TTTTTTTTTTTTTTTTTCTTTTTTTTTTTGAGATGTTAAAGACAAAATTTTGTTG |
| SINO | TTTTTTTTTTTTTTTTTTTTTTTTTTTTTGAGATGTTAAGAACAAAATTTTGTTG |
| SINP | TTTTTTTTTTTTTTTTTCTTTTTTTTTTTGAGATGTTAAGAACAAAATTTTGTTG |
| SINQ | TTTTTTTTTTTTTTTTTTTTTTTTTTTTTGGAATGTTAAAGACAAAATTTTGTTG |
| SINR | TTTTTTTTTTTTTTTTTTCTTTTTTTTTTGGAATGTTAAAGACAAAATTTTGTTG |
| SINS | TTTTTTTTTTTTTTTTTTTTTTTTTTTTTGAAGTGTTAGAAACAAAATTTTGTTG |
| SINT | TTTTTTTTTTTTTTTTCTTTTTTTTTTTTGAAGTGTTAGAAACAAAATTTTGTTG |
| SINU | TTTTTTTTTTTTTTTTTCTTTTTTTTTTTGAAATGTTAAGAACAAAATTTTGTTG |
| SINV | TTTTTTTTTTTTTTTTTCTTTTTTTTTTTGAAATGTTAAAAACAAAATTTTGTTG |
| AA1 | TTTTTTTTTTTTTTTTTTTTTTTTTTTTTAAAATTAAAAAAAAATTTTGTTG |
| AA9 | TTTTTTTTTTTTTTTTTTTTTTTTTTTTTGAAATATTAAAAACAAAATTTTGTTG |
| AA10 | TTTTTTTTTTTTTTTTTTTTTTTTTTTTTGAAATTTTAAAAACAAAATTTTGTTG |
| AA11 | TTTTTTTTTTTTTTTTTTTTTTTTTTTTTGAAACGTTGAAAACAAAATTTTGTTG |
| AA16 | TTTTTTTTTTTTTTTTTTTTTTTTTTTTCAAAATTTTGTTGATTAATAAAAGAAATAATAAAAGTTATGCAGACG |
| AA21 | TTTTTTTTTTTTTTTTTTTTTTTTTTTTTGAAATGTGAAAAACAAAATTTTGTTG |
| AA26 | TTTTTTTTTTTTTTTTTTTTTTTTTTTTTAAAAAAAATAATTTTTAAAAATAAAAATTTTGTTGATTAATAAAAG |
| AA32 | TTTTTTTTTTTTTTTTTTTTTTTTTTTTTAAAATTAAAAAAAAATTTTATTAAAATTAATTTTGTTG |
| AA33 | TTTTTTTTTTTTTTTTTTTTTTTTTTTTTTAATGTTAAAAACAAAATTTTGTTG |
| AA34 | TTTTTTTTTTTTTTTTTTTTTTTTTTTTTAAAAATATTAAAAAAATTTTGTTG |
| AA35 | TTTTTTTTTTTTTTTTTTTTTTTTTTTTTATAAAAAATTTTAAAAAAAATTTTGTTG |
| AA36 | TTTTTTTTTTTTTTTTTTTTTTTTTTTTTGAATGTTAAAAACAAAATTTTGTTG |
| SIN-MID | TTTTTTTTTTTTTTTTTTTTTTTTGGAATATTAAAACCAATTTTGTTG |
